# Supplementary material for: Assessing the Pre-Vaccination Anti-SARS-CoV-2 IgG Seroprevalence among Residents and Staff in Nursing Home in Niigata, Japan, November 2020
Source: MDPI journal article supplement (doi:10.3390/v14112581), 2022-11-21
Supplement: s1 [file s1]

**Supplementary Files for: Assessing the Pre-Vaccination Anti-SARS-CoV-2 IgG Seroprevalence among Residents and Staff in Nursing Home in Niigata, Japan, November 2020**

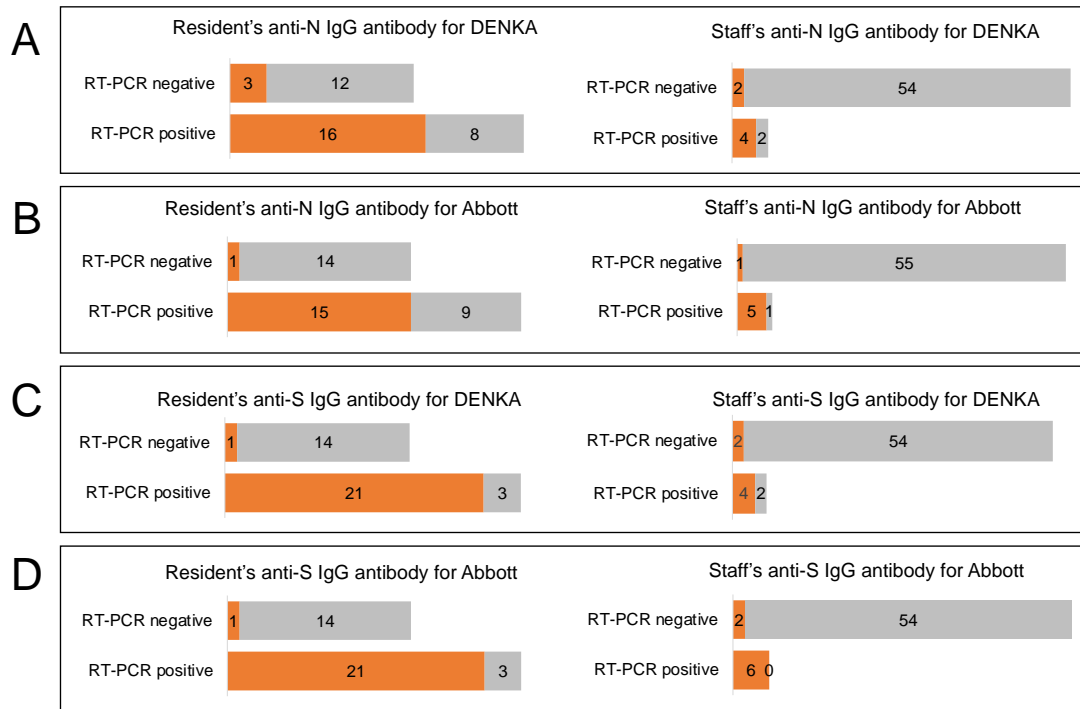

**Figure S1.** Seroprevalence in RT-PCR-positive and RT-PCR-negative participants (N=101). **(A)** Seroprevalence in reverse transcription PCR (RT-PCR)-positive and RT-PCR-negative participants in resident's and staff's anti-nucleocapsid (N) immunoglobulin G (IgG) antibody for DENKA (Tokyo, Japan). **(B)** Seroprevalence in RT-PCR-positive and RT-PCR-negative participants in resident's and staff's anti-N IgG antibody for Abbott (Illinois, USA). **(C)** Seroprevalence in RT-PCR-positive and RT-PCR-negative participants in resident's and staff's anti-spike (S) IgG antibody for DENKA. **(D)** Seroprevalence in RT-PCR-positive and RT-PCR-negative participants in resident's and staff's anti-S IgG antibody for Abbott. The bars represent the number of seropositive (orange) and seronegative (grey) participants, according to the RT-PCR test results, stratified for staff and residents for both DENKA and Abbott. The numbers in the bars represent absolute numbers.

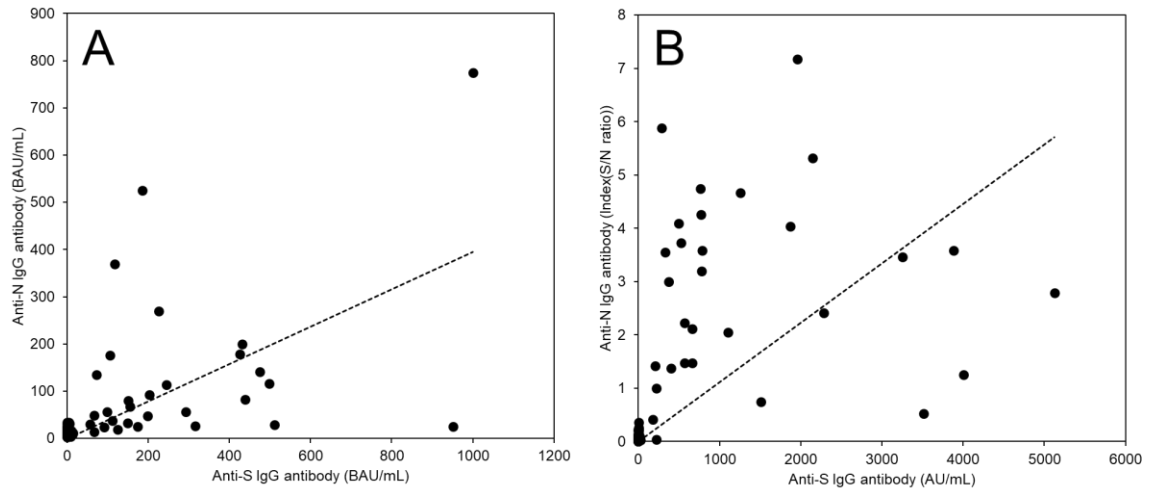

**Figure S2.** Bivariate relationship between anti-S IgG antibody and anti-N IgG antibody for DENKA and Abbott methods (N=101). Spearman's rank-order correlation coefficients ( $\rho$ ) between the anti-spike (S) immunoglobulin G (IgG) antibody and anti-nucleocapsid (N) IgG antibody for DENKA (Tokyo, Japan) and Abbott (Illinois, USA) were explored. Results with (A) DENKA ( $\rho=0.64$ ,  $P<0.01$ ) and (B) Abbott ( $\rho=0.66$ ,  $P<0.01$ ) are shown. Two samples were excluded because the test could not be performed, and the data analysis was performed on 101 cases.

**Table S1.** Concordance assessment between DENKA and Abbott methods for anti-N and anti-S IgG antibodies by resident or staff utilizing Cohen's kappa statistic (N=101).

| <b>Staff</b>        | <b>Cohen's kappa statistic (<math>\kappa</math>)</b> | <b>95% CI</b> |
|---------------------|------------------------------------------------------|---------------|
| Anti-N IgG antibody | 0.81                                                 | 0.56 to 1.00  |
| Anti-S IgG antibody | 0.83                                                 | 0.62 to 1.00  |
| <b>Resident</b>     | <b>Cohen's kappa statistic (<math>\kappa</math>)</b> | <b>95% CI</b> |
| Anti-N IgG antibody | 0.63                                                 | 0.39 to 0.88  |
| Anti-S IgG antibody | 0.84                                                 | 0.68 to 1.00  |

Abbreviations: CI, confidence interval; N, nucleocapsid; S, spike; IgG, immunoglobulin G.
